# Supplementary material for: A tandem CD19/CD20 CAR lentiviral vector drives on-target and off-target antigen modulation in leukemia cell lines
Source: PubMed Central journal article supplement (PMC5433150; doi:10.1186/s40425-017-0246-1), 2017-05-16
Supplement: 40425_2017_246_MOESM1_ESM.pdf [file 40425_2017_246_MOESM1_ESM.pdf]

## Supplementary files

**Supplementary Table 1: CD4/CD8 ratio of CART -transduced cell preparations.**

|       | <b>Donor 1</b> | <b>Donor 2</b> | <b>Donor 3</b> |
|-------|----------------|----------------|----------------|
| CAR T | CD4/CD8        | CD4/CD8        | CD4/CD8        |
| N.T.  | 4.4            | 7.4            | 3.2            |
| GFP   | 2.6            | 6.3            | 2.4            |
| 19A   | 4.6            | 11.4           | 2.5            |
| 20A   | 3.2            | 12.4           | 2.9            |
| 19B   | 5.9            | 13.3           | 2.4            |
| 1920  | 5.2            | 6.2            | 2.2            |
| 2019  | 4.7            | 8.1            | 2.1            |

### **Legend for Supplementary Table 1**

The CD4/CD8 ratio in CAR T cell preparations from three separate donors was determined by flow cytometry. The CD4<sup>+</sup> and CD8<sup>+</sup> T cells were co-purified from buffy coats, cells were activated with TransAct CD3 CD28 reagent in the presence of IL-2, transduced with LV as described in Materials and Methods, and assayed for CD4/CD8 composition on culture day 10, when immune function was assayed. The ratio of CD4/CD8 cells for each of the three donors is noted in columns, and CAR T groups noted in rows.

## Supplementary Figure 1. CAR-encoding vectors.

(a) pCD19CD20 CAR Vector Configuration:

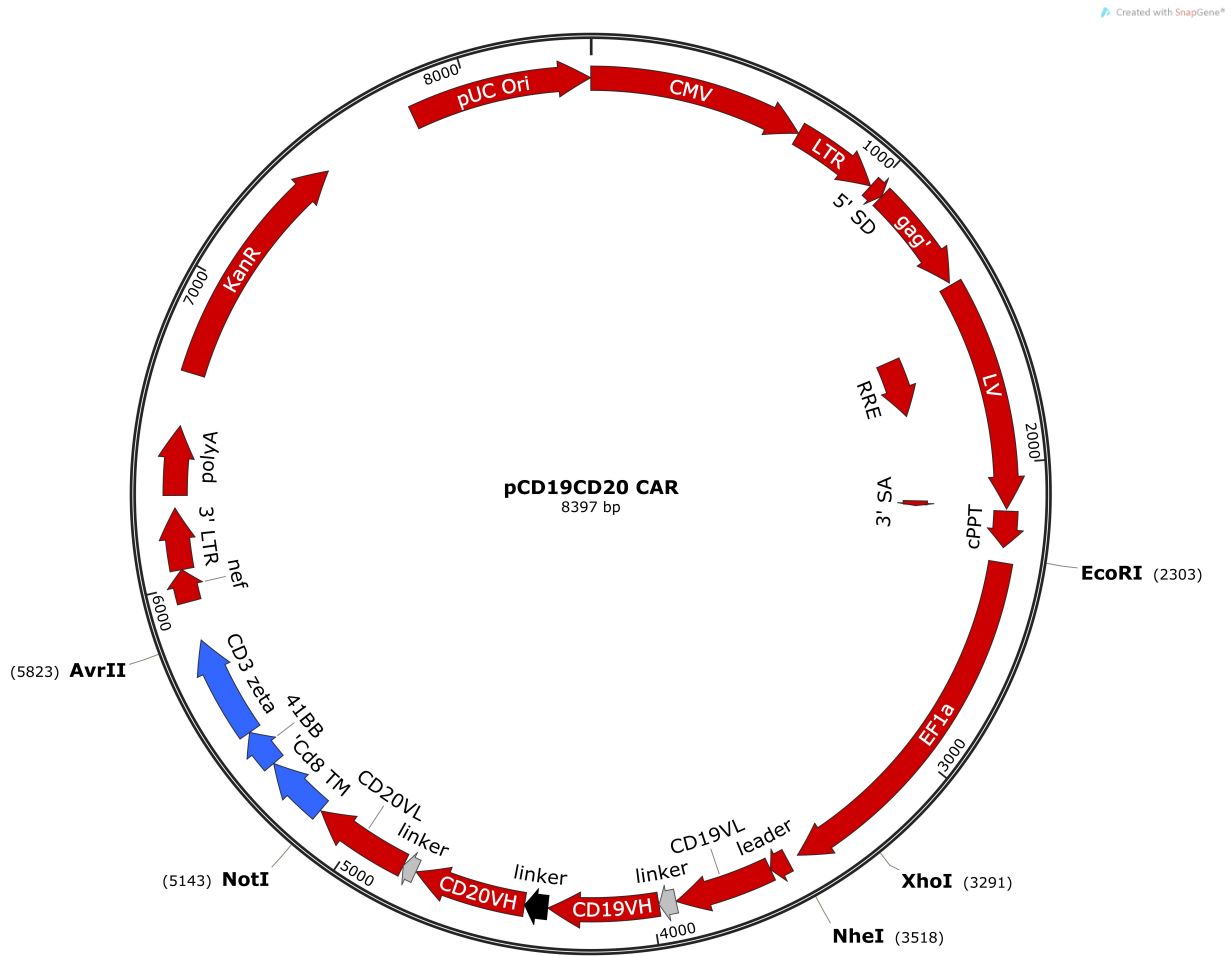

(b) pCD20CD19 CAR Vector Configuration:

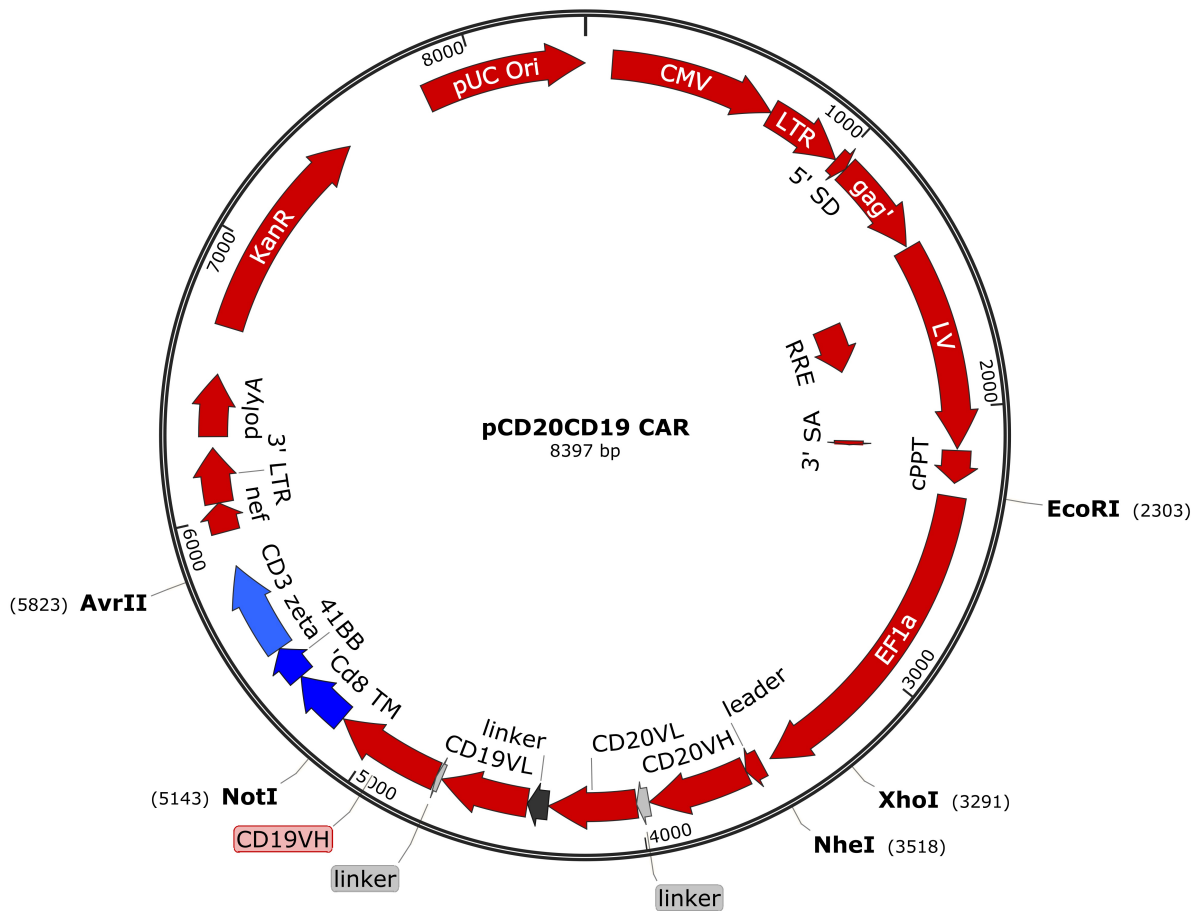

### Legend for Supplementary Figure 1:

Tandem CAR lentiviral vectors (LV) encoding the (a) CD19\_20 and the (b) CD20\_19 CARs were expressed using lentiviral backbone plasmids featuring a human EF-1alpha internal promoter (EF1a), leader sequence (leader), VH and VL sequence from FMC63 and Leu 16 antibodies (CD19VL, CD19VH, CD20 VL, CD20VH, respectively), inter-chain linker sequence (in grey), and intra-scFv sequence (in black), linked to CD8, 41BB, and CD3zeta signaling domains (in blue).
